# Supplementary material
Source: Springer Nature journal article supplement (https://www.springermedizin.de/resource/supplementary/12889_2013_6660_MOESM1_ESM.pdf/9498686)

Percentage of smokers by drinking status

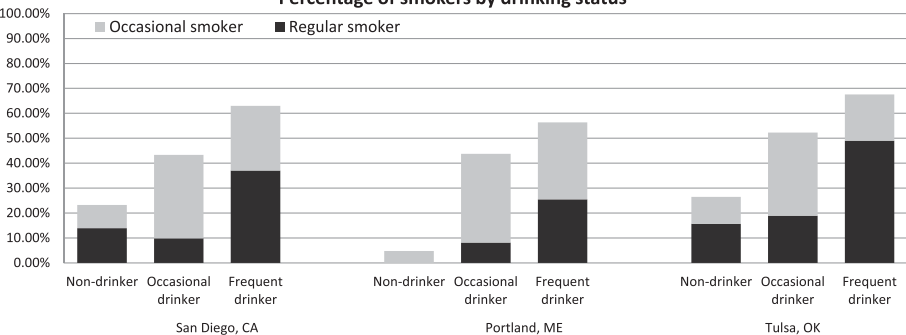

Percentage of smokers by binge drinking status

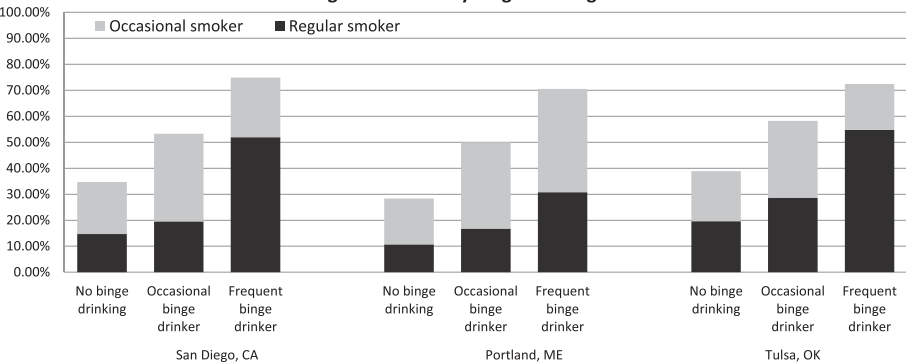

Supplement: MOESM1 [file 9498686]
